# Supplementary material
Source: ML conference proceedings conference paper supplement (https://proceedings.neurips.cc/paper_files/paper/2018/hash/851ddf5058cf22df63d3344ad89919cf-Abstract.html)
Supplement: Supplementary file [file 851ddf5058cf22df63d3344ad89919cf-Supplemental.zip]

# Adversarial vulnerability for any classifier (Supplementary material)

**Alhussein Fawzi**  
DeepMind  
afawzi@google.com

**Hamza Fawzi**  
Department of Applied Mathematics  
& Theoretical Physics  
University of Cambridge  
h.fawzi@damtp.cam.ac.uk

**Omar Fawzi**  
ENS de Lyon\*  
omar.fawzi@ens-lyon.fr

## A Proofs

### A.1 Useful results

Recall that we write the cumulative distribution function for the standard Gaussian distribution  $\Phi(x) = \frac{1}{\sqrt{2\pi}} \int_{-\infty}^x e^{-u^2/2} du$ . We state the Gaussian isoperimetric inequality [1, 2], the main technical tool used in to prove the results in this paper.

**Theorem A.1** (Gaussian isoperimetric inequality). *Let  $\nu_d$  be the Gaussian measure on  $\mathbb{R}^d$ . Let  $A \subseteq \mathbb{R}^d$  and let  $A_\eta = \{z \in \mathbb{R}^d : \exists z' \in A \text{ s.t. } \|z - z'\|_2 \leq \eta\}$ . If  $\nu_d(A) = \Phi(a)$  then  $\nu_d(A_\eta) \geq \Phi(a + \eta)$ .*

We then state some useful bounds on the cumulative distribution function for the Gaussian distribution  $\Phi$ .

**Lemma A.1** (see e.g., [3]). *We have for  $x \geq 0$ ,*

$$1 - \frac{e^{-x^2/2}}{\sqrt{2\pi}} \frac{2}{x + \sqrt{x^2 + 8/\pi}} \leq \Phi(x) \leq 1 - \frac{e^{-x^2/2}}{\sqrt{2\pi}} \frac{2}{x + \sqrt{x^2 + 4}}. \quad (\text{A.1})$$

**Lemma A.2.** *Let  $p \in [1/2, 1]$ , we have for all  $\eta > 0$ ,*

$$\Phi(\Phi^{-1}(p) + \eta) \geq 1 - (1 - p) \sqrt{\frac{\pi}{2}} e^{-\eta^2/2} e^{-\eta \Phi^{-1}(p)}. \quad (\text{A.2})$$

*If  $p = 1 - \frac{1}{K}$  for  $K \geq 5$  and  $\eta \geq 1$ , we have*

$$\Phi(\Phi^{-1}(1 - \frac{1}{K}) + \eta) \geq 1 - \frac{1}{K} \sqrt{\frac{\pi}{2}} e^{-\eta^2/2} e^{-\eta \sqrt{\log\left(\frac{K^2}{4\pi \log(K)}\right)}}. \quad (\text{A.3})$$

*Proof.* As  $p \geq 1/2$ , we have  $\Phi^{-1}(p) \geq 0$ . Thus,

$$\begin{aligned} \Phi(\Phi^{-1}(p) + \eta) &\geq 1 - \frac{1}{\sqrt{2\pi}} \frac{2e^{-(\Phi^{-1}(p) + \eta)^2/2}}{\Phi^{-1}(p) + \eta + \sqrt{(\Phi^{-1}(p) + \eta)^2 + 8/\pi}} \\ &= 1 - \frac{1}{\sqrt{2\pi}} \frac{2e^{-\Phi^{-1}(p)^2/2 - \eta^2/2 - \eta \Phi^{-1}(p)}}{\Phi^{-1}(p) + \eta + \sqrt{(\Phi^{-1}(p) + \eta)^2 + 8/\pi}} \\ &= 1 - \left( \frac{1}{\sqrt{2\pi}} \frac{2e^{-\Phi^{-1}(p)^2/2}}{\Phi^{-1}(p) + \sqrt{\Phi^{-1}(p)^2 + 4}} \right) \\ &\quad \times \frac{\Phi^{-1}(p) + \sqrt{\Phi^{-1}(p)^2 + 4}}{\Phi^{-1}(p) + \eta + \sqrt{(\Phi^{-1}(p) + \eta)^2 + 8/\pi}} e^{-\eta^2/2 - \eta \Phi^{-1}(p)}. \end{aligned}$$

---

\*Univ Lyon, ENS de Lyon, CNRS, UCBL, LIP, F-69342, Lyon Cedex 07, France

Now we use the fact that

$$\left( \frac{1}{\sqrt{2\pi}} \frac{2e^{-\Phi^{-1}(p)^2/2}}{\Phi^{-1}(p) + \sqrt{\Phi^{-1}(p)^2 + 4}} \right) \leq 1 - \Phi(\Phi^{-1}(p)) = 1 - p.$$

As a result,

$$\begin{aligned} & \Phi(\Phi^{-1}(p) + \eta) \\ & \geq 1 - (1-p)e^{-\eta^2/2 - \eta\Phi^{-1}(p)} \frac{\Phi^{-1}(p) + \sqrt{\Phi^{-1}(p)^2 + 4}}{\Phi^{-1}(p) + \eta + \sqrt{(\Phi^{-1}(p) + \eta)^2 + 8/\pi}} \\ & \geq 1 - (1-p)e^{-\eta^2/2 - \eta\Phi^{-1}(p)} \frac{\Phi^{-1}(p) + \sqrt{\Phi^{-1}(p)^2 + 4}}{\Phi^{-1}(p) + \sqrt{\Phi^{-1}(p)^2 + 8/\pi}} \\ & \geq 1 - (1-p)e^{-\eta^2/2} e^{-\eta\Phi^{-1}(p)} \frac{\sqrt{4}}{\sqrt{8/\pi}}. \end{aligned}$$

In the case  $p = 1 - \frac{1}{K}$ , it suffices to show that for  $K \geq 5$ , we have

$$\Phi^{-1}(1 - 1/K) \geq \sqrt{\log \left( \frac{K^2}{4\pi \log(K)} \right)}. \quad (\text{A.4})$$

Using the upper bound in (A.1), and the fact that  $x + \sqrt{x^2 + 2} \leq 2\sqrt{x^2 + 1}$ , it suffices to show that  $\frac{1}{2} \frac{e^{-x^2}}{\sqrt{\pi}\sqrt{x^2+1}} \geq \frac{1}{K}$  where  $x = \sqrt{\frac{1}{2} \log \left( \frac{K^2}{4\pi \log(K)} \right)}$ . This inequality is equivalent to showing that  $\sqrt{\log(K)} \geq \sqrt{x^2 + 1}$  for the same value of  $x$ . If we let  $u = \log(K)$  this amounts to showing that  $\sqrt{u} \geq \sqrt{u - \frac{1}{2} \log(4\pi u) + 1}$  for all  $u \geq \log(5)$ . For such  $u$  one can verify that  $-\frac{1}{2} \log(4\pi u) + 1 \leq 0$  and so clearly the inequality is satisfied.  $\square$

## A.2 Proof of Theorem 1

*Proof.* To prove the general bound in Eq. (2), we define

$$C_{i \rightarrow} = \{x \in C_i : \text{dist}(x, \cup_{j \neq i} C_j) \leq \eta\}.$$

Here,  $\text{dist}(x, C)$  is defined as  $\inf_{x' \in C} \|x - x'\|$ . Let us also introduce the following sets in the  $z$ -space:  $B_i = g^{-1}(C_i)$  and  $B_{i \rightarrow} = \{z \in B_i : \text{dist}(z, \cup_{j \neq i} B_j) \leq \omega^{-1}(\eta)\}$ . It is easy to verify that  $g(B_{i \rightarrow}) \subseteq C_{i \rightarrow}$ . Thus we have  $\mathbb{P}(C_{i \rightarrow}) = \nu(g^{-1}(C_{i \rightarrow})) \geq \nu(B_{i \rightarrow})$ . Now note that  $B_{i \rightarrow} \cup \cup_{j \neq i} B_j$  is nothing but the set of points that are at distance at most  $\omega^{-1}(\eta)$  from  $\cup_{j \neq i} B_j$ . As such, by the Gaussian isoperimetric inequality (Theorem A.1) applied with  $A = \cup_{j \neq i} B_j$  and  $a = a_{\neq i}$ , we have  $\nu(B_{i \rightarrow}(\eta)) + \nu(\cup_{j \neq i} B_j) \geq \Phi(a_{\neq i} + \omega^{-1}(\eta))$ , i.e.,  $\nu(B_{i \rightarrow}) \geq \Phi(a_{\neq i} + \omega^{-1}(\eta)) - \Phi(a_{\neq i})$ . As  $B_{i \rightarrow}$  are disjoint for different  $i$ , we have

$$\nu(\cup_i B_{i \rightarrow}(\eta)) \geq \sum_{i=1}^K (\Phi(a_{\neq i} + \omega^{-1}(\eta)) - \Phi(a_{\neq i})).$$

The proof of inequality (2) of the main text then follows by using  $\mathbb{P}(C_{i \rightarrow}) \geq \nu(B_{i \rightarrow})$ .

To prove inequality (3), observe that if  $\mathbb{P}(C_i) \leq \frac{1}{2}$  for all  $i$ , then  $\mathbb{P}(\cup_{j \neq i} C_j) \geq \frac{1}{2}$  for all  $i$ . Then we use the bound (A.2) to get,

$$\begin{aligned} \mathbb{P}(\cup_i C_{i \rightarrow}(\eta)) &\geq \sum_{i=1}^K (\Phi(\Phi^{-1}(\mathbb{P}(\cup_{j \neq i} C_j)) + \eta) - \mathbb{P}(\cup_{j \neq i} C_j)) \\ &\geq \sum_{i=1}^K (1 - (1 - \mathbb{P}(\cup_{j \neq i} C_j)) \sqrt{\frac{\pi}{2}} e^{-\eta^2/2} - \mathbb{P}(\cup_{j \neq i} C_j)) \\ &= (1 - \sqrt{\frac{\pi}{2}} e^{-\eta^2/2}) \sum_{i=1}^K (1 - \mathbb{P}(\cup_{j \neq i} C_j)) \\ &= 1 - \sqrt{\frac{\pi}{2}} e^{-\eta^2/2} . \end{aligned}$$

For the bound (4) that makes explicit the dependence on the number of classes, we simply use the more explicit bound in (A.3).  $\square$

### A.3 Proof of Theorem 2

*Proof.* Let  $x = g(z) \in \mathcal{X}$  and  $x' \in \mathcal{X}$ . Let  $z^*$  be such that  $\tilde{f}(x') = f(g(z^*))$ . By definition of  $\tilde{f}$ , we have  $\|x' - g(z^*)\| \leq \|x' - g(z)\|$ . As such, using the triangle inequality, we get

$$\begin{aligned} \|g(z) - g(z^*)\| &\leq \|g(z) - x'\| + \|x' - g(z^*)\| \\ &\leq 2\|g(z) - x'\| . \end{aligned}$$

Taking the minimum over all  $x'$  such that  $\tilde{f}(x) \neq \tilde{f}(x')$ , we obtain

$$r_{\text{in}}(x) \leq 2r_{\text{unc}}(x).$$

$\square$

### A.4 Proof of Theorem 3

*Proof.* We use the same notations as in the proof of Theorem 1: let  $B_i(f) = g^{-1}(C_i(f))$  and  $B_i(h) = g^{-1}(C_i(h))$ , and let

$$B_{i \rightarrow} = \{z \in B_i(f) \cup B_i(h) : \text{dist}(z, \overline{B_i(f)} \cap \overline{B_i(h)}) \leq \omega^{-1}(\eta)\}.$$

where the notation  $\overline{B}$  stands for the complement of  $B$ .

Note that  $B_i(f) \cup B_i(h) = \overline{\overline{B_i(f)} \cap \overline{B_i(h)}}$ . We have  $\nu(\overline{B_i(f)} \cap \overline{B_i(h)}) \geq \nu(\overline{B_i(f)}) - \delta = 1 - \nu(B_i(f)) - \delta \geq \frac{1}{2}$ . Thus, using the Gaussian isoperimetric inequality with  $A = \overline{B_i(f)} \cap \overline{B_i(h)}$ , we obtain

$$\nu(B_{i \rightarrow}) + \nu(\overline{B_i(f)} \cap \overline{B_i(h)}) \geq 1 - \left(1 - \nu(\overline{B_i(f)} \cap \overline{B_i(h)})\right) \sqrt{\frac{\pi}{2}} e^{-\eta^2/2},$$

where we also used inequality (A.2). As a result,

$$\begin{aligned} \nu(B_{i \rightarrow}) &\geq (1 - \nu(\overline{B_i(f)} \cap \overline{B_i(h)}))(1 - \sqrt{\frac{\pi}{2}} e^{-\eta^2/2}) \\ &\geq \nu(B_i(f))(1 - \sqrt{\frac{\pi}{2}} e^{-\eta^2/2}) . \end{aligned}$$

Now assume that  $z \in B_{i \rightarrow}$  but also  $z \in B_i(f) \cap B_i(h)$ . Then it is classified as  $i$  for both  $f$  and  $h$ . In addition, the condition  $z \in B_{i \rightarrow}$  ensures that there exists  $z' \in \overline{B_i(f)} \cap \overline{B_i(h)}$  such that  $\|z - z'\|_2 \leq \omega^{-1}(\eta)$ . Setting  $v = g(z') - g(z)$ , we have that  $f(g(z) + v) \neq f(g(z))$  and  $h(g(z) + v) \neq h(g(z))$  and  $\|v\| \leq \omega(\|z - z'\|) \leq \eta$ . As such it suffices to show that the set  $B_{i \rightarrow} \cap (B_i(f) \cap B_i(h))$  has sufficiently large measure. Indeed, we have

$$\begin{aligned} &\nu(B_{i \rightarrow} \cap (B_i(f) \cap B_i(h))) \\ &\geq \nu(B_{i \rightarrow}) - \nu(B_i(f) \cap \overline{B_i(h)}) - \nu(\overline{B_i(f)} \cap B_i(h)) . \end{aligned}$$

Summing over  $i$ , we get

$$\sum_{i=1}^K \nu(B_{i \rightarrow} \cap (B_i(f) \cap B_i(h))) \geq 1 - \sqrt{\frac{\pi}{2}} e^{-\eta^2/2} - 2\delta,$$

because  $\sum_{i=1}^K \nu(B_i(f) \cap \overline{B_i(h)}) + \nu(\overline{B_i(f)} \cap B_i(h)) = 2 \cdot \nu\{f \circ g(z) \neq h \circ g(z)\} \leq 2\delta$ .

□

#### A.5 Proof of Theorem 4

*Proof.* We first treat the case  $\delta = 0$ . Given  $z$  we denote by  $r_{\mathcal{Z}}(z) = \min\{\|r\|_2 : f(g(z+r)) \neq f(g(z))\}$ . Then it is easy to see that  $r_{\text{in}}(g(z)) \leq \omega(r_{\mathcal{Z}}(z))$ . As such we have  $\mathbb{E}_x[r_{\text{in}}(x)] = \mathbb{E}_z[r_{\text{in}}(g(z))] \leq \mathbb{E}_z[\omega(r_{\mathcal{Z}}(z))] \leq \omega(\mathbb{E}_z[r_{\mathcal{Z}}(z)])$ . Now we have

$$\mathbb{E}_z[r_{\mathcal{Z}}(z)] = \int_0^\infty \mathbb{P}_z[r_{\mathcal{Z}}(z) \geq \eta] d\eta.$$

Using a bound similar to Theorem 1 applied to  $r_{\mathcal{Z}}$  we get

$$\begin{aligned} \mathbb{E}_z[r_{\mathcal{Z}}(z)] &\leq \int_0^\infty \left(1 - \sum_{i=1}^K \Phi(a_{\neq i} + \eta) - \Phi(a_{\neq i})\right) d\eta \\ &= \sum_{i=1}^K \int_0^\infty \Phi(-a_{\neq i} - \eta) d\eta \end{aligned}$$

where in the equality, we used the fact that  $1 = \sum_{i=1}^K (1 - \Phi(a_{\neq i}))$ . Now observe that for any  $a \in \mathbb{R}$ ,

$$\begin{aligned} \int_0^\infty \Phi(-a - \eta) d\eta &= \int_a^\infty \int_{-\infty}^{-u} \frac{e^{-t^2/2}}{\sqrt{2\pi}} dt du \\ &= \int_{-\infty}^\infty \left( \int_a^\infty \mathbf{1}_{t \leq -u} du \right) \frac{e^{-t^2/2}}{\sqrt{2\pi}} dt \\ &= \int_{-\infty}^\infty (-t - a) \mathbf{1}_{a \leq -t} \frac{e^{-t^2/2}}{\sqrt{2\pi}} dt \\ &= \frac{e^{-a^2/2}}{\sqrt{2\pi}} - a\Phi(-a). \end{aligned}$$

As a result,

$$\mathbb{E}_z[r_{\mathcal{Z}}(z)] \leq \sum_{i=1}^K -a_{\neq i} \Phi(-a_{\neq i}) + \frac{e^{-a_{\neq i}^2/2}}{\sqrt{2\pi}}$$

This establishes the first inequality.

Assuming now that the classes are equiprobable, i.e.,  $a_{\neq i} = \Phi^{-1}(1 - 1/K) =: a(K)$  for all  $i$  we get that

$$\mathbb{E}[r_{\text{in}}(x)] \leq \omega \left( -a(K)^2 + \frac{K}{\sqrt{2\pi}} e^{-a(K)^2/2} \right).$$

Using the bound (A.4) on  $a(K)$  we get:

$$\begin{aligned} \mathbb{E}[r_{\text{in}}(x)] &\leq \omega \left( \sqrt{2 \log(K)} - \sqrt{2 \log(K) - \log(4\pi \log(K))} \right) \\ &= \omega \left( \frac{\log(4\pi \log(K))}{\sqrt{2 \log(K)} + \sqrt{2 \log(K) - \log(4\pi \log(K))}} \right) \\ &\leq \omega \left( \frac{\log(4\pi \log(K))}{\sqrt{2 \log(K)}} \right) \end{aligned}$$

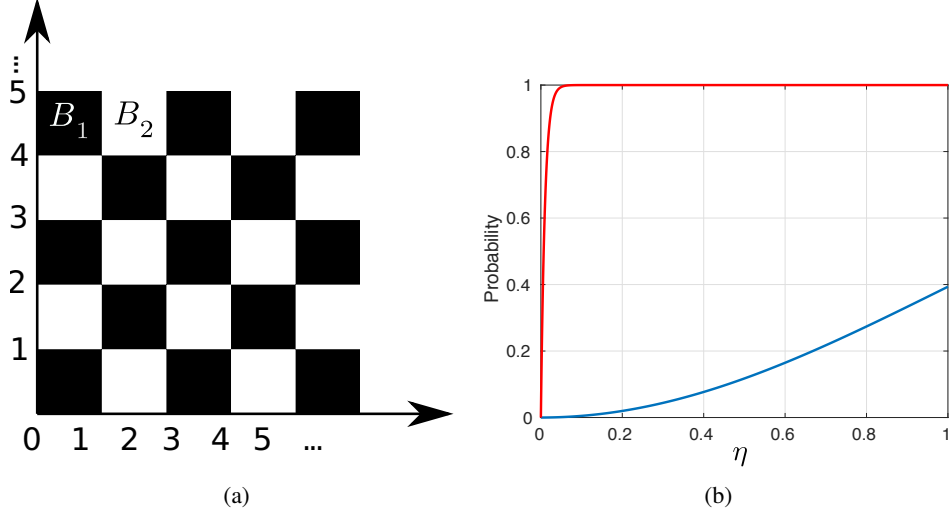

Figure 1: Left: Illustration of checkerboard example. Right: Lower bound on robustness as a function of  $\eta$  for the general result in Theorem 1 (blue curve) and the checkerboard example in Eq. A.5 (red curve).

We assume now that  $g$  is such that  $W(g_*(\nu), \mu) \leq \delta$ , where  $W$  denotes the Wasserstein distance in  $(\mathcal{X}, \|\cdot\|)$ . Let  $(X, X')$  be a coupling with  $X \sim \mu$  and  $X' \sim g_*(\nu)$ . We will construct a random variable  $X''$  such that almost surely  $X''$  and  $X$  are classified differently. We define  $X'' = X'$  if  $X$  and  $X'$  are classified differently and otherwise  $X'' = X' + \bar{r}^*(X')$  where  $\bar{r}^*(X')$  is defined to be a vector of minimum norm such that  $X' + \bar{r}^*(X')$  and  $X'$  are classified differently. Then we have

$$\begin{aligned}
& \mathbb{E}_{x \sim \mu} r_{\text{unc}}(x) \\
& \leq \mathbb{E} \|X - X''\| \\
& = \mathbb{E}(\mathbf{1}_{f(X) \neq f(X')} \|X - X'\|) + \mathbb{E}(\mathbf{1}_{f(X) = f(X')} \|X - (X' + \bar{r}^*(X'))\|) \\
& \leq \mathbb{E} \|X - X'\| + \mathbb{E} \|\bar{r}^*(X')\|.
\end{aligned}$$

By choosing a coupling such that  $W(g_*(\nu), \nu) = \mathbb{E} \|X - X'\|$ , we get  $\mathbb{E} \|X - X'\| \leq \delta$ . In addition,  $\mathbb{E} \|\bar{r}^*(X')\| \leq \mathbb{E}_x r_{\text{in}}(x)$ . The statement therefore follows.  $\square$

## B Toy example: tightness of Theorem 1

As an illustration to Remark 4, we explicitly show through a toy example that a classifier which is not linear in the  $\mathcal{Z}$ -space can be significantly less robust than a linear one.

**Example B.1** (Checkerboard class partitions). Assume that  $B_1 = g^{-1}(C_1)$  and  $B_2 = g^{-1}(C_2)$  are given by:

- $B_1 = \{(z_1, \dots, z_d) : \sum_{i=1}^d \lfloor z_i \rfloor \bmod 2 = 0\}$ ,
- $B_2 = \mathbb{R}^d - B_1$ .

See Fig. 1a for an illustration. Then, we have

$$\mathbb{P}(z \in B_1 \text{ and } \text{dist}(z, B_2) \leq \eta) + \mathbb{P}(z \in B_2 \text{ and } \text{dist}(z, B_1) \leq \eta) \geq 1 - (1 - \eta)^d. \quad (\text{A.5})$$

Fig 1b compares the general bound in Theorem 1 to Eq. (A.5). As can be seen, in the checkerboard partition example, the probability of fooling converges much quicker to 1 (wrt  $\eta$ ) than the general result in Theorem 1. Hence, a classifier that creates many disconnected classification regions can be much more vulnerable to perturbations than a linear classifier in the latent space.

*Proof.* We have  $\nu(B_1) = \nu(B_2) = \frac{1}{2}$ . Let  $z \in \mathbb{R}^d$  in  $B_2$  be such that for some  $i \in \{1, \dots, d\}$ ,  $z_i - \lfloor z_i \rfloor \in [0, \eta) \cup (1 - \eta, 1)$ , then  $z - \eta e_i \in B_1$  or  $z + \eta e_i \in B_1$ , and thus  $z$  is at distance at most  $\eta$

from  $B_1$ . As a result, if  $z$  is at distance  $> \eta$  from  $B_1$ , then for all  $i \in \{1, \dots, d\}$ ,  $z_i - \lfloor z_i \rfloor \in [\eta, 1 - \eta]$ . As a result,

$$\begin{aligned} & \mathbb{P}_z(z \in B_2, \text{dist}(z, B_1) > \eta) \\ & \leq \mathbb{P}_z(z \in B_2, \forall i, z_i - \lfloor z_i \rfloor \in [\eta, 1 - \eta]) \\ & = \frac{1}{\sqrt{2\pi}^d} \sum_{\substack{(j_1, \dots, j_d) \in \mathbb{Z}^d, \\ j_1 + \dots + j_d \bmod 2 = 1}} \int_{j_1 + \eta}^{j_1 + 1 - \eta} dz_1 \cdots \int_{j_d + \eta}^{j_d + 1 - \eta} dz_d e^{-\frac{\sum_i z_i^2}{2}}. \end{aligned}$$

Now observe that for any  $j \in \mathbb{Z}$ , as the function  $z \mapsto e^{-z^2/2}$  is monotone on the interval  $[j, j + 1]$  (nondecreasing if  $j < 0$  and nonincreasing if  $j \geq 0$ ). Thus, we have  $\int_{j+\eta}^{j+1-\eta} e^{-\frac{z^2}{2}} dz \leq (1 - \eta) \int_j^{j+1} e^{-\frac{z^2}{2}} dz$ , when  $\eta \leq \frac{1}{2}$ . As a result,

$$\begin{aligned} & \mathbb{P}_z(z \in B_2, \text{dist}(z, B_1) > \eta) \\ & \leq \frac{1}{\sqrt{2\pi}^d} (1 - \eta)^d \sum_{\substack{(j_1, \dots, j_d) \in \mathbb{Z}^d, \\ \sum_i j_i \bmod 2 = 1}} \int_{j_1}^{j_1 + 1} dz_1 \cdots \int_{j_d}^{j_d + 1} dz_d e^{-\frac{\sum_i z_i^2}{2}} \\ & = (1 - \eta)^d \mathbb{P}_z(z \in B_2) \\ & = \frac{1}{2} (1 - \eta)^d. \end{aligned}$$

With the same reasoning,  $\mathbb{P}_z(z \in B_1, \text{dist}(z, B_2) > \eta) \leq \frac{1}{2} (1 - \eta)^d$  and gives inequality (A.5).  $\square$

## C Experimental results

### C.1 Details of the used models

For the SVHN dataset, we resize the images to  $64 \times 64$ . For the generative model, we use the PyTorch implementation of DCGAN available on <https://github.com/pytorch/examples/blob/master/dcgan/main.py> using the default parameters for architecture and optimization. The 2-layer LeNet classifier has the following architecture:

$$\begin{aligned} & \text{Conv}(5, 2, 16) \rightarrow \text{ReLU} \rightarrow \text{MaxPool}(4) \\ & \rightarrow \text{Conv}(5, 2, 32) \rightarrow \text{ReLU} \rightarrow \text{MaxPool}(4) \rightarrow \text{FC}(10), \end{aligned}$$

where the parameters of Conv are kernel size, padding and number of filters, respectively. We used the ResNet18 and ResNet101 architectures available on <https://github.com/kuangliu/pytorch-cifar/blob/master/models/resnet.py>, with a kernel size of 5 for Conv1 and a stride of 2. For all 3 architectures, we used SGD with a learning rate of 0.01, momentum of 0.9, batch size of 100. To solve the problem in Eq. A.6, we use gradient descent (for the maximization of  $\|g(z) - g(z')\|_2$ ) with learning rate 0.1 for 1,000 steps. The upper bound was computed based on 100 samples of  $z$ .

For the CIFAR-10 experiment, we use a similar DCGAN generative model. The VGG-type architecture has 11 conv layers, each of kernel size 3, with number of output channels (64, 64, 128, 128, 128, 256, 256, 256, 512, 512, 512) and stride (1, 1, 2, 1, 1, 2, 1, 1, 2, 1, 1). Each conv layer is followed by BatchNorm and a ReLU function. For the WideResNet architecture, we use the WRN-28-10 model available on <https://github.com/szagoruyko/wide-residual-networks>. SGD is used with learning rate 0.1, momentum 0.9, and batchsize 100. For the adversarially trained Wide ResNet with PGD training, we have used the model of [4].

### C.2 Numerical evaluation of the upper bound

To evaluate numerically the upper bound, we have used a probabilistic version of the modulus of continuity, where the property is not required to be satisfied for *all*  $z, z'$ , but rather with high probability, and accounted for the error probability in the bound. Specifically, while the modulus

of continuity function is given by  $\omega(\delta) = \max_z \max_{z': \|z-z'\|_2 \leq \delta} \|g(z) - g(z')\|_2$ , we use in the experiments a probabilistic version of the modulus of continuity, given by:

$$\omega_\kappa(\delta) = \min \left\{ \alpha : \mathbb{P} \left( \sup_{z': \|z-z'\|_2 \leq \delta} \|g(z) - g(z')\|_2 \geq \alpha \right) \leq \kappa \right\}. \quad (\text{A.6})$$

Then, the following bound holds for any  $\delta, \kappa$ :

$$\mathbb{P}(r_{\text{in}}(x) \geq \omega_\kappa(\delta)) \leq \kappa + \underbrace{\mathbb{P}(\exists r : \|r\|_2 \geq \delta : f(g(z+r)) \neq f(g(z)))}_{1 - \text{probability in Theorem 1 with } \omega \text{ identity}}. \quad (\text{A.7})$$

For example, when  $\kappa$  is set to 0, we recover the exact bounds in Theorem 1. When  $\kappa > 0$ , we have to account for the use of a probabilistic definition of the modulus of continuity in the bound; this exactly corresponds to the additive  $\kappa$  term in the probability in Eq. (A.7).

In practice, for a fixed target probability (set to 0.25 in the experiments of the main paper), it is possible to choose the value of  $\delta$  that yields the best bound, since Eq. (A.7) is valid for any  $\delta$ . For a fixed value of  $\delta$ , we used gradient descent (until the loss function stabilizes) in order to solve the optimization problem  $\sup_{z': \|z'-z\|_2 \leq \delta} \|g(z) - g(z')\|$ . For a fixed value of  $\delta$ , we hence summarize the procedure used to evaluate the upper bound in Algorithm 1. We have used in practice 100 samples to estimate the upper bound, for each value of  $\delta$ . For any value of  $\delta$ , Algorithm 1 provides an estimate of the upper bound; such an estimate can be improved by using many different values of  $\delta$ .

---

**Algorithm 1** Numerical evaluation of the upper bound.

---

```

1: // input:  $\delta$ , target probability  $p_t$ .
2: // output: numerical upper bound.
3:  $p \leftarrow p_t - p_u(\delta)$ . //  $p_u(\delta)$  is the probability from Theorem 1 with  $\omega$  set to identity.
4: repeat:  $i = 1, \dots$ 
5:   Sample  $z_i \sim \mathcal{N}(0, I_d)$ .
6:   Compute  $s_i \leftarrow \sup_{z': \|z_i - z'\|_2 \leq \delta} \|g(z_i) - g(z')\|$ .
7: until enough samples are taken
8: Use the above  $s_i$  to estimate  $\alpha$  such that  $\tilde{\mathbb{P}}(s_i \geq \alpha) \leq p$ , where  $\tilde{\mathbb{P}}$  is the empirical probability distribution.
return  $\alpha$ .
```

---

### C.3 Illustration of generated images

Fig. 2 illustrates generated images for SVHN, as well as corresponding perturbed images that fool a ResNet-18 classifier (*in-distribution* robustness). Similarly, Fig. 3 illustrates examples of generated images for CIFAR-10, as well as perturbed samples required to fool the VGG classifier, where perturbed images are constrained to belong to the data distribution (i.e., *in-distribution* setting).

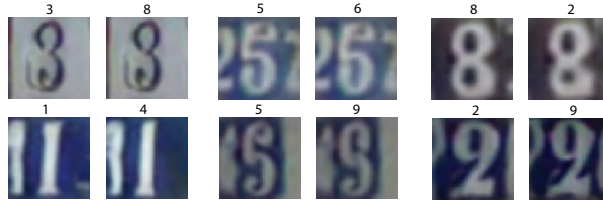

Figure 2: Examples of generated images with DCGAN for the SVHN dataset, and associated perturbed images (*in-distribution* perturbations). For each pair of images, the left shows the original image, and the right shows the perturbed image. The estimated label (using ResNet-18) of each image is shown on top of each image.

## References

- [1] C. Borell, “The Brunn-Minkowski inequality in Gauss space,” *Inventiones mathematicae*, vol. 30, no. 2, pp. 207–216, 1975.

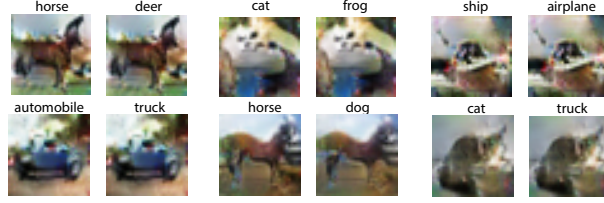

Figure 3: Examples of generated images with DCGAN, and associated perturbed image (in-distribution perturbation). For each pair of images, the left shows the original image, and the right shows the perturbed image. The estimated label (using the VGG-type convnet) of each image (original and perturbed) is shown on top of each image.

- [2] V. N. Sudakov and B. S. Tsirel'son, "Extremal properties of half-spaces for spherically invariant measures," *Journal of Soviet Mathematics*, vol. 9, no. 1, pp. 9–18, 1978.
- [3] L. Duembgen, "Bounding standard gaussian tail probabilities," *arXiv preprint arXiv:1012.2063*, 2010.
- [4] A. Madry, A. Makelov, L. Schmidt, D. Tsipras, and A. Vladu, "Towards deep learning models resistant to adversarial attacks," *arXiv preprint arXiv:1706.06083*, 2017.
